1 **Soft sweeps are the dominant mode of adaptation in the human genome**

2

3 Daniel R. Schrider<sup>\*, †, 1</sup> and Andrew D. Kern<sup>\*, †</sup>

4

5 <sup>\*</sup>Department of Genetics, Rutgers University, Piscataway, NJ, 08854, USA

6 <sup>†</sup>Human Genetics Institute of New Jersey, Rutgers University, Piscataway, NJ, 08554, USA

7

8 <sup>1</sup>Corresponding author: Department of Genetics, Rutgers University, 604 Allison Rd.,

9 Piscataway, NJ 08854. E-mail: dan.schrider@rutgers.edu

10

11 Keywords: adaptation, selective sweeps, soft sweeps, machine learning, population genomics

12 Running title: Adaptation via soft sweeps is prevalent in humans

## 13 **ABSTRACT**

14 The degree to which adaptation in recent human evolution shapes genetic variation remains  
15 controversial. This is in part due to the limited evidence in humans for classic “hard selective  
16 sweeps,” wherein a novel beneficial mutation rapidly sweeps through a population to fixation.  
17 However, positive selection may often proceed via “soft sweeps” acting on mutations already  
18 present within a population. Here we examine recent positive selection across six human  
19 populations using a powerful machine learning approach that is sensitive to both hard and soft  
20 sweeps. We found evidence that soft sweeps are widespread and account for the vast majority of  
21 recent human adaptation. Surprisingly, our results also suggest that linked positive selection  
22 affects patterns of variation across much of the genome, and may increase the frequencies of  
23 deleterious mutations. Our results also reveal insights into the role of sexual selection, cancer  
24 risk, and central nervous system development in recent human evolution.

25

## 26 **INTRODUCTION**

27 Spurred by the ongoing revolution in DNA sequencing capacity, human population genetic  
28 datasets have grown exponentially in size over the past five years (Auton et al. 2015; UK10K  
29 Consortium 2015). Such growth enables insight into the evolutionary histories of human  
30 populations with hitherto unrivaled precision. A central question in the study of human evolution  
31 is the extent to which adaptation has driven recent evolution and affected patterns of genetic  
32 diversity (Akey 2009). This can be addressed by scanning genomic data for evidence of selective  
33 sweeps, wherein a beneficial mutation is favored by natural selection and therefore rapidly  
34 increases in frequency within a population. Such selective sweeps leave a characteristic footprint  
35 in variation; they create a valley of diversity around the selected site (Maynard Smith and Haigh

36 1974; Kaplan et al. 1989; Stephan et al. 1992), a deficit of both low- and high-frequency derived  
37 alleles at linked sites (Fay and Wu 2000), and an increase in linkage disequilibrium in flanking  
38 regions (Kim and Nielsen 2004). Thus there are multiple population genetic signals to exploit.  
39 Accordingly numerous theoretical and methodological advances (Kaplan et al. 1989; Stephan et  
40 al. 1992; Fu 1997; Kim and Stephan 2002; Nielsen et al. 2005b; Voight et al. 2006) in the study  
41 of selective sweeps have given researchers the ability to uncover the genetic basis of adaptation  
42 on a genome-wide scale.

43         There are two complimentary approaches to studying the impact of adaptive evolution on  
44 genetic variation. The first approach aims to infer genome-wide rates of adaptive evolution by  
45 estimating the mean effects of selective sweeps across the genome (Wiehe and Stephan 1993;  
46 Kern et al. 2002; Andolfatto 2007; Jensen et al. 2008; Hernandez et al. 2011; Sattath et al. 2011).  
47 Such approaches may estimate the rates of sweeps or their effects with respect to the genomic  
48 background, but do not focus on the targets of sweeps themselves. An alternative approach is to  
49 focus on finding individual selective sweeps throughout the genome, and in so doing characterize  
50 specific cases of adaptation with hopes of gaining general insight into the adaptive process  
51 (Sabeti et al. 2002; Voight et al. 2006; Williamson et al. 2007). The search for selective sweeps  
52 has shed light into the recent evolutionary histories of natural populations, and has shown a  
53 pervasive impact of adaptive evolution on polymorphism in some species such as *Drosophila*  
54 *melanogaster* (Begun et al. 2007; Macpherson et al. 2007; Langley et al. 2012; Lee et al. 2013;  
55 Garud et al. 2015). In humans, the picture remains less clear: while scans for selective sweeps  
56 have discovered numerous compelling candidates for strong positive selection (e.g. Ruwende et  
57 al. 1995; Stephens et al. 1998; Tishkoff et al. 2007; Bryk et al. 2008; Huerta-Sánchez et al.  
58 2014), some recent studies have suggested that the impact of adaptation on patterns of variation

59 genome-wide is quite limited (Hernandez et al. 2011; Lohmueller et al. 2011). Conversely, Enard  
60 et al. (2014) argue that the genome-wide reduction in diversity around substitutions is driven in  
61 part by positive selection.

62 One possible explanation for the difficulty in characterizing the contributions of adaptive  
63 and non-adaptive forces in human populations is that genetic hitchhiking effects may be muted  
64 by human demographic history. Many human populations appear to have experienced  
65 bottlenecks and/or recent growth (Marth et al. 2004; Fagundes et al. 2007; Gravel et al. 2011;  
66 Auton et al. 2015), which cause much of the genome to resemble selective sweeps (Nielsen et al.  
67 2005b). Moreover, positive selection has historically been modeled as the process of a *de novo*  
68 beneficial mutation rapidly sweeping to fixation, a process now referred to as a hard sweep.  
69 However selection may act on previously segregating neutral or weakly deleterious variants (Orr  
70 and Betancourt 2001; Innan and Kim 2004). Selection on standing variation will produce  
71 qualitatively different skews in linkage disequilibrium and allele frequencies, along with a  
72 shallower valley in diversity (Hermisson and Pennings 2005; Przeworski et al. 2005; Berg and  
73 Coop 2015; Schrider et al. 2015)—such an event is thus referred to as a soft sweep. If selection  
74 typically proceeds through soft sweeps, as may be the case in *Drosophila* (Garud et al. 2015),  
75 then many sweeps may have been missed by previous scans that were designed to detect  
76 signatures produced under a hard sweep model.

77 We sought to address the controversy over the impact of adaptation on human genomic  
78 variation by conducting a genome-wide scan for both hard and soft selective sweeps across  
79 human populations. We previously developed S/HIC (Soft/Hard Inference through  
80 Classification), a machine learning method capable of detecting completed sweeps and inferring  
81 their mode of selection with unparalleled accuracy and robustness to non-equilibrium

82 demography (Schrider and Kern 2016). Here we apply S/HIC to uncover hard and soft sweeps in  
83 six population samples from the 1000 Genomes Project (Auton et al. 2015), thereby performing  
84 the most comprehensive investigation of completed selective sweeps in humans to date.  
85 Surprisingly, our results suggest that patterns of polymorphism across much of the human  
86 genome may be affected by linked positive selection—primarily soft sweeps. Moreover, we find  
87 evidence that the mode of selection differs substantially across populations, with non-African  
88 populations adapting via hard sweeps to a much greater extent than African populations. Finally,  
89 we investigate the biological targets of selection in recent human evolution, with particular  
90 processes such as immunity, cancer, and sexual reproduction playing outsized roles.

91

## 92 **RESULTS**

93 We set out to detect completed hard and soft selective sweeps in six populations from Phase 3 of  
94 the 1000 Genomes Project: two West-African populations (YRI and GWD from Yoruba and The  
95 Gambia, respectively), one East-African population (LWK from Kenya), one European  
96 population (CEU, from Utah, USA), one East Asian population (JPT from Japan), and one from  
97 the Americas (PEL from Peru). For each population we trained and applied a S/HIC classifier to  
98 identify hard and soft selective sweeps across the genome (Methods), distinguishing them from  
99 neutrally evolving regions as well as those linked to sweeps (Schrider and Kern 2016). Briefly,  
100 S/HIC is a machine learning method that leverages spatial patterns of a variety of statistics across  
101 a large genomic window in order to infer the mode of evolution at the center of the window. We  
102 previously showed that S/HIC is exceptionally robust to the confounding effect of linked  
103 selection (e.g. the "soft shoulder" effect where regions linked to hard sweeps resemble soft  
104 sweeps; Schrider et al. 2015), as well as non-equilibrium demographic histories, making it well

105 suited for a survey of positive selection in humans. We also assessed the accuracy of our  
106 classifiers on simulated test data with the same demographic history used to generate training  
107 data, finding that S/HIC achieved good power for each demographic history, with somewhat  
108 higher accuracy for histories inferred from the African than non-African populations  
109 (supplementary fig. S1).

110 We also performed forward simulations under the GWD and JPT models (Methods) in  
111 order to assess whether purifying selection and its effect on variation at linked unselected sites  
112 (i.e. background selection Charlesworth et al. 1993) could result in false sweep calls. The results  
113 of these simulations suggest that S/HIC's false positive rate is essentially unaffected by these  
114 forces (supplementary fig. S1). Note that we exposed each classifier to a wide range of mutation  
115 and recombination rates (see Methods) during training (and testing) in order to improve (and  
116 assess) our robustness to variation in these rates across the genome. We also examined values of  
117 Garud et al.'s (2015)  $H_{12}$  and  $H_2/H_1$  within windows classified by S/HIC as hard, soft, or neutral,  
118 noting that as expected,  $H_{12}$  is higher in sweeps than neutral regions, while  $H_2/H_1$  is higher for  
119 soft sweeps than hard sweeps (supplementary fig. S2). Below, we begin with a brief overview of  
120 the broad patterns of adaptation we observe across populations, before discussing genomic  
121 features and biological pathways with a strong enrichment of selective sweeps, as well as  
122 compelling novel candidates for recently completed selective sweeps.

123

### 124 **The majority of sweeps in humans resemble selection on standing variation**

125 We found a total of 1,927 distinct selective sweeps merged across all six populations (Methods).  
126 190 (9.9%) of these are present in all populations, 59 (3.1%) are shared among the African  
127 populations, 71 (3.7%) are shared among the non-African populations, and 701 (36.4%) are

128 population-specific (supplementary table S1). The remaining 906 (47.0%) sweeps were present  
129 in more than one population but do not fit into any of the categories above. We observe that  
130 across populations, the vast majority (1,776, or 92.2%) of sweeps were classified as soft, and  
131 note that this trend does not change qualitatively as we impose increasingly strict posterior  
132 probability thresholds before assigning a class label to a given window (supplementary table S2;  
133 Methods). These events may represent soft sweeps on standing genetic variants that our classifier  
134 was trained to detect, but we note that a similar signature can be created by a soft sweep resulting  
135 from recurrent origination of the adaptive allele(s), or by a *de novo* mutation that has been placed  
136 onto multiple haplotypes by allelic gene conversion events (see Discussion).

137         Although hard sweeps appear to be quite rare globally, the fraction of hard sweeps is  
138 significantly higher in non-African than African populations (table 1). For example, when  
139 comparing PEL to GWD, we observe a significantly higher fraction of hard sweeps in PEL  
140 (4.7% versus 1.6%;  $p=0.05$ ). For each other African vs. non-African comparison we see an even  
141 greater (and more significant) disparity. Further, we observe a suggestive correlation between the  
142 fraction of sweeps in a population that were classified as soft and the harmonic mean of its  
143 population size within the last  $4N$  generations (Pearson's  $\rho=-0.96$ ; Methods). Though taken at  
144 face value this correlation appears to be highly significant, we note that due to the six  
145 populations' shared evolutionary history a statistical test of this correlation would be invalid.

146         Comparing our results to those of previous scans we find that 519 of S/HIC's sweep calls  
147 (26.9%) have previously been identified according to dbPSHP, a database of candidate regions  
148 for recent positive selection across human populations (Li et al. 2013). This accounts for 10.9%  
149 of the loci in the dbPSHP set (ignoring regions not classified by S/HIC). The remaining 1,408  
150 sweeps called by S/HIC (73.1% of calls) represent potentially novel selective sweeps. There are

151 several possible explanations for the modest overlap between our set of sweep candidates and  
152 those in dbPSHP. First, the sweep candidates in dbPSHP have been identified by a variety of  
153 methods, some of which are designed to detect selective scenarios other than completed sweeps  
154 (e.g. partial sweeps, spatially varying selection). Second, when comparing results from methods  
155 designed to detect the same type of sweeps, the intersection between studies is often fairly small  
156 (Akey 2009). Although most scans undoubtedly recover a large number of true selective sweeps,  
157 different methods may produce different false positives and false negatives, resulting in  
158 imperfect concordance between scans.

159

### 160 **Selective sweeps preferentially target genes involved in cancer and viral infection**

161 Examining the locations of selective sweeps across the genome, we find that regions classified as  
162 selective sweeps are significantly overrepresented for both coding sequence and untranslated  
163 regions ( $q < 0.05$  in several populations for hard sweeps, and each population for putative soft  
164 sweeps; fig. 1A, B; supplementary table S3), relative to data sets with permuted classifications  
165 (see Methods). Enrichment for transcription factor binding sites was less pronounced, and only  
166 significant in soft sweeps for the three African populations along with PEL. The most striking  
167 result we observed was a dramatic enrichment of sweep windows for mutations in the COSMIC  
168 data set of somatic mutations that have been observed in cancer cells (Forbes et al. 2015) and  
169 may therefore play a role in tumor suppression/progression. Averaged across populations, the  
170 number of COSMIC mutations found in soft sweeps represents a 3.7-fold increase relative to that  
171 observed in permuted data sets; this enrichment was significant in each population, and peaked at  
172 4.5-fold in PEL. For hard sweeps, this enrichment was 12-fold on average, reaching as high as  
173 21-fold in CEU, though this was the only population for which the enrichment was statistically



174 significant. We also observed a sizeable overrepresentation of genes encoding virus-interacting  
175 proteins (VIPs) curated by (Enard et al. 2016) in soft sweeps, with a 1.9-fold increase relative to  
176 permuted sets (averaged across populations). VIPs show a similar magnitude of enrichment in  
177 hard sweeps for some populations, but does not achieve significance at  $q < 0.05$ .

178

### 179 **Selective sweeps increase linked deleterious variation**

180 Because S/HIC not only detects selective sweeps, but also attempts to identify regions of the  
181 genome that appear to be linked to recent sweeps, our classifications allow us to examine the  
182 effect of linked selection in a principled way. We found that while a minority of genomic  
183 windows were classified as selective sweeps (7.6% on average across all populations), a large  
184 fraction of windows were classified as linked to a completed selected sweep, either hard or soft  
185 (56.4% on average). These estimates range from 41.5% in JPT to 74.0% in GWD (fig. 2).

186 We also asked whether selective sweeps have a detectable impact on linked deleterious  
187 variation. As beneficial alleles increase in frequency in a population, they may carry along with  
188 them linked deleterious polymorphisms as hitchhikers, potentially increasing the frequency of  
189 deleterious variants over what would be expected given mutation-selection-drift equilibrium  
190 (Birky and Walsh 1988; Hartfield and Otto 2011). To this end we asked whether relatively  
191 common candidate deleterious mutations were enriched in regions classified as either hard-  
192 linked or soft-linked. Indeed, we observed a fairly subtle but significant overrepresentation of  
193 SNPs with derived allele frequencies of at least 0.01 but predicted to be damaging by SIFT  
194 (Kumar et al. 2009) in both the hard-linked (mean enrichment across populations: 1.3-fold) and  
195 soft-linked (mean enrichment: 1.1-fold) classes for most populations (fig. 1C, D; supplementary  
196 table S3). We find a similar enrichment in these sweep-linked classes of common SNPs in

197 regions inferred to be conserved across primates according to phastCons (Siepel et al. 2005).  
198 Phenotype-associated variants from the GWAS catalogue (Welter et al. 2014) were also  
199 significantly overrepresented sweep-linked regions in several populations (Fig 1C, D).

200

## 201 **Sexual reproduction, the central nervous system, and immunity are targets of recent** 202 **sweeps**

203 In order to determine if positive selection preferentially acts on particular organismal functions,  
204 we asked which Gene Ontology (GO) terms were enriched in our sweep calls relative to the  
205 permuted data (Methods). In soft sweeps, we found a sizeable and significant enrichment  
206 ( $q < 0.05$ ) of terms related to sperm development, structure, and function. For example,  
207 “spermatogenesis” (4.4-fold enrichment averaged across populations), and “sperm-egg  
208 recognition” (3.9-fold enrichment on average) were enriched in soft sweeps in several  
209 populations. We also observed an overrepresentation of genes involved in the “glutamate  
210 receptor signaling pathway” in our soft sweep sets for each population (4-fold mean enrichment).  
211 Glutamate receptors are the primary excitatory neurotransmitter in the central nervous system,  
212 and important for both proper brain development and function (Luján et al. 2005). Indeed, soft  
213 sweeps are enriched for “central nervous system development” in multiple populations (1.6-fold  
214 mean enrichment). Numerous GO terms related to immune response, especially adaptive  
215 immunity, as well as KEGG pathways related to immunity and cancer progression/tumor  
216 suppression were also significantly enriched among soft sweeps (see supplementary table S4 for  
217 full list).

218

## 219 **Positive selection on interacting gene pairs**

220 We examined three types of gene interaction networks: protein-protein interactions (PPIs),  
221 transcription factor-target gene interactions, and genetic interactions where one gene modifies  
222 the effect of another (Methods). Interestingly, we observed a dramatic enrichment of sweeps in  
223 genes that encode proteins that physically interact with one another (fig. 3A–B): if a gene  
224 overlapped a window classified as a soft sweep, genes that interact with this gene were on  
225 average 3.3 times more likely to overlap a putative soft sweep than expected by chance  
226 ( $p < 0.0001$  for each population; fig. 3B). Despite the smaller number of candidate regions, we  
227 found a significant enrichment for PPIs in hard sweeps, though this was only significant in for  
228 non-African populations (4.0-fold enrichment averaged across populations;  $p < 0.05$  in CEU, JPT,  
229 YRI; fig. 3A). For transcription factor-target interactions, we observe no overrepresentation of  
230 soft sweeps, but a significant enrichment of hard sweeps in non-African populations ( $p < 0.05$  for  
231 each; 8.5-fold enrichment on average; fig. 3C–D). There were no populations exhibiting an  
232 overrepresentation of pairs of genes with genetic interactions and experiencing sweeps of either  
233 type (fig. 3E–F).

234

### 235 **Examples of novel selective sweep candidates**

236 In this section we describe several sweep candidates that exemplify the set of sweeps, and  
237 functions of putative targets of selection, that we were able to detect. As discussed above, our  
238 sets of sweeps were highly enriched for glutamate receptor-encoding genes. In supplementary  
239 fig. S3, we show a sweep candidate region on chromosome 4 that encompasses the glutamate  
240 receptor gene *GRIA2*. This sweep was previously detected in non-African populations by  
241 Pickrell et al. (2009), who did not find any evidence of selection in Africa. However, S/HIC  
242 infers that this region has experienced a soft sweep that is found in GWD and YRI, as well as the

243 non-African populations. Consistent with this, Europeans, Asians, and African populations show  
244 a reduction in  $\pi$ , a trough in Tajima's  $D$  (Tajima 1989), and a peak in Nielsen et al.'s  
245 SweepFinder composite likelihood ratio (CLR) test statistic, which captures regions that appear  
246 to be at the epicenter of the spatial skew in the SFS expected around sweeps (Nielsen et al.  
247 2005b). Intriguingly, *GRIA2* interacts with the *GRID2* glutamate receptor gene (Kohda et al.  
248 2003), which itself is classified as a soft sweep in CEU, LWK, PEL, and GWD. The remaining  
249 glutamate receptors overlapping identified sweeps are *GRIA4*, *GRID1*, *GRIK1*, *GRIK3*, *GRM2*,  
250 and *GRM7*. Of these genes, *GRIA4* and *GRID2* were shown by Liu et al. (2012) to have evolved  
251 a human-specific developmental expression profile.

252 Fig. 4 shows a region on chromosome 9 that exhibits strong evidence of a previously  
253 undetected hard sweep in each of our six populations. This region contains several members of  
254 the spermatogenesis associated 31 gene family: *SPATA31B1*, *SPATA31D1*, *SPATA31D3*, and  
255 *SPATA31D4*. Across populations this region shows dramatic valleys in  $\pi$  and Tajima's  $D$ , as well  
256 as an elevated CLR near the center of the sweep window. These genes are highly testis-specific  
257 according to data from the GTEx project (Lonsdale et al. 2013), and male mice are infertile when  
258 lacking *Spata31*, another member of these gene family (Wu et al. 2015). fig. 4 also shows that  
259 each of these genes overlaps a cluster of non-repetitive piRNAs (data from piRBase; Zhang et al.  
260 2014). Also near this region is *DDX10P2*, which GENCODE annotates as a processed  
261 pseudogene (Pei et al. 2012). *DDX10P2*, which is located at the center of the CLR peak for CEU,  
262 is expressed with a high degree of testis-specificity according to GTEx data, similar to the  
263 neighboring *SPATA31* genes. A BLAT search (Kent 2002) revealed that this putative  
264 pseudogene exhibits 99.5% sequence identity to the orthologous sequence in chimpanzees. The

265 parent gene of *DDX10P2*, *DDX10*, is expressed in many tissues, but shows highest expression in  
266 the testis.

267 On chromosome 11 we detected what appear to be several novel soft sweeps present in  
268 and upstream of *CADMI* (cell adhesion molecule 1; fig. 5), one of which is present in each  
269 population. This gene is essential for spermatogenesis in mice (Van Der Weyden et al. 2006),  
270 and is also a tumor suppressor that is hypermethelated in various cancers (Kuramochi et al. 2001;  
271 Allinen et al. 2002; Fukuhara et al. 2002), as it works with the adaptive immune system to  
272 suppress metastasis (Faraji et al. 2012). *CADMI* is also active in the brain where it is involved in  
273 synaptic adhesion and has been linked to autism (Zhiling et al. 2008; Fujita et al. 2010). *CADMI*  
274 forms a complex with two other genes: the GABA receptor *GABBR2*, which has a soft sweep in  
275 YRI, and *MUPPI*, which has a soft sweep found in each population; this complex appears to  
276 localize to Purkinje cell dendrites (Fujita et al. 2012). Thus, this example encompasses many of  
277 the functions that we find are highly enriched across our sweep sets: adaptation in multiple  
278 interacting genes (one of which is a neurotransmitter), spermatogenesis, and tumor suppression  
279 (via adaptive immunity).

280

## 281 **DISCUSSION**

282 Understanding the history of human adaptation at the genetic level is a central goal of population  
283 genomics and human evolutionary biology. Accordingly, since the completion of the human  
284 genome assembly (Lander et al. 2001) and subsequent proliferation of population genomic data,  
285 numerous genome-wide scans for selection have been conducted using differing methodologies  
286 (Sabeti et al. 2002; Voight et al. 2006; Sabeti et al. 2007; Pickrell et al. 2009; Field et al. 2016).  
287 The majority of these studies searched primarily for partial selective sweeps—the signature of a

288 beneficial mutation currently sweeping through a population (see Williamson et al. 2007 for a  
289 notable exception)—and rightly so, as these sweeps can reveal the targets of ongoing adaptation  
290 in human populations. However, because the sojourn of an adaptive mutation to fixation should  
291 be rapid (e.g. on the order of 400 generations, assuming  $N=10^4$  and a moderately strong selection  
292 coefficient of  $s = 0.05$ , and 4000 generations for  $s=0.005$ ), the success of efforts to detect  
293 ongoing selection implies the presence of a larger number of recently completed sweeps. We  
294 have therefore focused on completed sweeps in order to complement previous studies and to  
295 construct a more comprehensive catalogue of the loci underpinning recent human adaptation.  
296 Using a powerful and robust machine learning method that we have recently introduced (S/HIC;  
297 Schrider and Kern 2016) for finding completed selective sweeps, we performed a genome-wide  
298 search for the targets of recent positive selection in six human populations. Furthermore, we  
299 sought to determine the mode of positive selection, distinguishing between selection on *de novo*  
300 mutations and on previously standing variation.

301

### 302 **Soft sweeps dominate human adaptation**

303 Perhaps our most consequential result is the finding that the majority of our candidate sweeps  
304 resemble soft sweeps on standing variation. This result implies that adaptation in humans may  
305 not be mutation-limited (Gillespie 1991; Karasov et al. 2010): rather than waiting for a novel  
306 mutation to arise, human populations may often be able to respond via selection on previously  
307 segregating polymorphisms, thereby more rapidly responding to novel environmental challenges.  
308 This may be surprising given the apparently small effective population size and low nucleotide  
309 diversity levels in humans. However, if the mutational target for the trait to be selected on is

310 fairly large, then the probability of a population harboring a mutation affecting that trait may be  
311 appreciable.

312 While soft sweeps appear to be the dominant mode of selection globally, there is a  
313 significant increase in the proportion of putative hard sweeps in non-African populations relative  
314 to African populations. This is consistent with theoretical expectations, as larger populations  
315 have more standing variation for selection to act on (Hermisson and Pennings 2005). Moreover,  
316 the human migration out of Africa was associated with a severe population bottleneck (Marth et  
317 al. 2004; Fagundes et al. 2007). Soft selective sweeps may be “hardened” by a reduction in  
318 population size, which can result in the stochastic loss of some genetic backgrounds harboring  
319 the adaptive allele so that only a single haplotype reaches fixation (Wilson et al. 2014). Thus,  
320 though one might expect selection on segregating neutral or nearly neutral variation when a  
321 population enters a new environment with novel selective pressures, if the migration event is  
322 accompanied by a bottleneck then the population may experience a somewhat counterintuitive  
323 increase in the proportion of hard sweeps. Moreover, the causal relationship between population  
324 size and mode of adaptation may not be unidirectional. As Orr and Unckless (2014) have shown  
325 in the context of evolutionary rescue, when faced with a changing environment, a population  
326 which does not harbor standing variation that is beneficial may experience a more protracted  
327 decline in size while it waits for an adaptive *de novo* mutation.

328 Our genome-wide results amplify results of earlier studies that by design have tried to  
329 infer the mode of adaptation in a smaller number of targeted loci. For instance Peter *et al.* (Peter  
330 et al. 2012) attempted to infer the mode of adaptation among 7 loci previously identified to be  
331 under selection in human populations. They report that half of the loci that they could  
332 confidently classify supported selection on standing variation. In *Drosophila melanogaster*,

333 when looking among strong outliers of haplotype homozygosity, Garud *et al.* (2015) found that  
334 patterns of variation in those regions were consistent with recent soft selective sweeps. Our  
335 finding, that the vast majority of sweeps in human populations are soft sweeps, thus underscores  
336 the ubiquity of selection from standing variation in natural populations. Indeed it seems plausible  
337 that adaptation from standing variation might be the rule, rather than the exception.

338         There are two caveats affecting our ability to discriminate between selection on standing  
339 variation and on *de novo* mutations. First, while we have trained our classifier to detect soft  
340 sweeps on previously segregating mutations, soft sweeps may also occur via recurrent mutation  
341 to the adaptive allele (Pennings and Hermisson 2006b, a). Though there are some qualitative  
342 differences between these two models of soft sweeps (Berg and Coop 2015; Schrider *et al.*  
343 2015), these are fairly subtle in comparison to the differences between the other models we  
344 consider. Thus, our classifiers may have sensitivity to both types of sweeps. If this is so, then  
345 some of the soft sweeps that we detect may result from recurrent mutation. Additionally, gene  
346 conversion during a sweep can transfer the adaptive mutation on to new genetic backgrounds  
347 (Jones and Wakeley 2008), thereby “softening” the sweep (Schrider *et al.* 2015). This implies  
348 that selection on a single *de novo* mutation could sometimes appear to be a soft sweep in our  
349 classification. In any case, our finding that most sweeps in humans do not appear to be hard  
350 sweeps underscores the importance of using methods that are sensitive to soft sweeps.

351

### 352 **Extensive impact of linked positive selection**

353 Our analysis demonstrates that the impact of linked positive selection on genetic variation is  
354 considerable, with roughly half of the genome classified by S/HIC as being influenced by a  
355 nearby sweep. This result has important implications for efforts to infer demographic histories



356 from patterns of genetic polymorphism, as most inference methods hinge on the assumption of  
357 neutrality. Indeed, we have recently shown that linked positive selection has the potential to  
358 severely confound demographic inferences (Schridder et al. 2016). Similarly, Ewing and Jensen  
359 (2016) have found that background selection (Charlesworth et al. 1993) can also bias  
360 demographic estimates. One strategy is to use only those polymorphisms that are distant from  
361 genes and conserved noncoding elements to mitigate these effects (Gazave et al. 2014). One  
362 could further supplement such an approach by using S/HIC to directly ask which intergenic  
363 regions are unaffected by hitchhiking in order to further diminish the bias introduced by linked  
364 selection. We note that the putatively neutrally evolving regions found in this study can be  
365 obtained from our raw classification output (available at <https://github.com/kern->  
366 [lab/shIC/tree/master/humanScanResults](https://github.com/kern-lab/shIC/tree/master/humanScanResults)).

367         If linked positive selection affects much of the genome, then that implies that the  
368 frequencies of many neutral or weakly deleterious mutations may be altered by genetic draft  
369 (Gillespie 2000). That is to say, deleterious mutations that happen to reside on chromosomes that  
370 begin to sweep may be able to reach higher frequencies than expected from mutation-selection-  
371 drift equilibrium. Consistent with this, we observe a slight but significant excess of potentially  
372 deleterious polymorphisms in windows classified as linked to selective sweeps. Previously, Chun  
373 and Fay (2011) found evidence that the ratio of deleterious to neutral polymorphisms is elevated  
374 in sweep regions, concluding that hitchhiking carries linked deleterious variants to higher  
375 frequencies. Our finding that SNPs from the GWAS catalogue are also enriched regions linked to  
376 selective sweeps lends further support to this hypothesis. Indeed, several compelling examples of  
377 hitchhiking mutations known or suspected of causing disease have been described in the  
378 literature (Helgason et al. 2007; Chun and Fay 2011; Huff et al. 2012). Moreover it seems that

379 the phenomenon of deleterious alleles hitchhiking along with strongly beneficial alleles is not  
380 restricted to humans: a recent study also uncovered evidence that selection during domestication  
381 increased the frequency of deleterious polymorphisms in dogs (Marsden et al. 2016).

382

### 383 **Targets of recent human selective sweeps**

384 Our catalogue of sweep candidates allowed us to characterize the biological functions that are  
385 overrepresented in sweeps. Notably, we found a strong excess of spermatogenesis genes within  
386 sweep regions, a phenomenon previously observed by Voight et al. (2006). This signature may  
387 be a result of sexual selection, sexual conflict, and/or sperm competition (Swanson and Vacquier  
388 2002). We also observed a significant enrichment of cancer-related genes among our sweep  
389 candidates. Nielsen et al. (2005a) found a similar enrichment of candidate genes under selection  
390 related to cancer when examining protein divergence between humans and chimpanzees. These  
391 authors found that some of these genes are also involved in spermatogenesis (much like our  
392 *CADMI* example), and concluded that genomic conflict between tumor suppression and the  
393 advantage of avoiding apoptosis during spermatogenesis may explain the selection on cancer  
394 genes. An alternative (and non-mutually exclusive) explanation is that the increase in longevity  
395 along the human lineage has created an immense selective pressure to reduce the rate of cancer  
396 progression by orders of magnitude (Nunney and Muir 2015).

397 We also observed a significant excess of glutamate receptor genes targeted by sweeps,  
398 suggesting that these loci may underlie some of the dramatic neurological changes that have  
399 occurred along the human lineage. Consistent with this, we previously found evidence  
400 suggesting some of these glutamate receptor genes (along with other neurotransmitters) may  
401 have recently gained novel regulatory elements in humans (Schridder and Kern 2015; Meyer et al.

402 2017). The most striking examples of glutamate receptors experiencing sweeps are *GRIA2* and  
403 *GRID2*, which show strong signatures of selection in multiple populations and physically interact  
404 with one another. The action of positive selection on multiple members of the protein complex  
405 appears to be a general phenomenon (fig. 3). For a more in-depth examination of positive  
406 selection in the PPI network, see Qian et al. (2015), who found that genes in candidate regions  
407 for positive selection were more likely to lie close together in the PPI network.

408

## 409 **Conclusions**

410 Our investigation has revealed several valuable insights into the adaptive process in human  
411 populations. The success of our approach exemplifies the potential of machine learning methods  
412 to elucidate the adaptive process in humans and other species (Fan et al. 2016). To date several  
413 machine learning methods have been devised to detect selective sweeps (Pavlidis et al. 2010; Lin  
414 et al. 2011; Ronen et al. 2013; Pybus et al. 2015; Sheehan and Song 2016), and they tend to  
415 substantially outperform more traditional approaches (see Schrider and Kern 2016). We suspect  
416 that machine learning could be used to make important inroads in answering a variety of  
417 evolutionary questions.

418 Finally, Hernandez et al. (2011) argued that hard selective sweeps might be rare in human  
419 populations, and instead suggested that the majority of adaptation might be a consequence of  
420 selection on standing variation or selection on polygenic traits. We here find direct evidence that  
421 indeed this is the case—the vast bulk of human adaptation is occurring as a consequence of soft  
422 sweeps. Our observation thus reconciles Hernandez et al.’s findings with those of Enard et al.,  
423 who conclude that the reduction in diversity around amino acid substitutions is caused by  
424 widespread selective sweeps (Enard et al. 2014). Moreover, while our scan leveraged a method

425 that performs very well in detecting both hard and soft sweeps, it was not trained to detect cases  
426 of polygenic selection (e.g. Berg and Coop 2014). It is fair to assume that a large majority of  
427 phenotypes are determined by multiple loci, thus polygenic selection should be expected to be  
428 common. If that were the case, then it could very well be that an even larger portion of genetic  
429 variation is influenced by natural selection and its linked effects throughout the genome.

430

## 431 **METHODS**

### 432 **Sequence and annotation data**

433 We downloaded phased genotype data from Phase 3 of the 1000 Genomes Project (Auton et al.  
434 2015). This data set consists of 26 population samples from Africa, East Asia, South Asia,  
435 Europe, and the Americas. We wished to include only populations where the influence of  
436 admixture/migration on genetic variation appeared to be minimal, while still allowing us to  
437 characterize selection across multiple continents. We therefore chose to scan the following  
438 populations for selective sweeps: the GWD (Gambians in Western Divisions in The Gambia) and  
439 YRI (Yoruba in Ibadan, Nigeria) populations from West Africa, LWK (Luhya in Webuye,  
440 Kenya) from East Africa, JPT (Japanese in Tokyo, Japan) from Asia, CEU (Utah residents with  
441 Northern and Western European Ancestry) from Europe, and PEL (Peruvians from Lima, Peru)  
442 from the Americas. Examining Auton et al.'s results from running ADMIXTURE (Alexander et  
443 al. 2009), we see that for most values of  $K$ , each of these populations appears to correspond  
444 primarily to a single ancestral population rather than displaying multiple clusters of ancestry (see  
445 Extended Data Figure 5 from Auton et al. 2015). One exception may be the PEL population, but  
446 among the highly admixed American samples it appears to exhibit the smallest amount of  
447 possible mixed ancestry (for most values of  $K$ ), so we retained this population in order to have

448 some representation from the Americas. We opted not to examine any South Asian population,  
449 as for each of these samples ADMIXTURE inferred evidence of ancestry from three or more  
450 ancestral populations.

451 We downloaded numerous annotation data sets containing genomic features to test for  
452 enrichment/depletion of selective sweeps and perform other downstream analyses. These  
453 included GENCODE gene model release 19 (Harrow et al. 2012) including pseudogenes (Pei et  
454 al. 2012), virus-interacting proteins from Enard et al. (2016), enhancers gained or along the  
455 human lineage since diverging from Old World monkeys (Cotney et al. 2013), and SIFT's  
456 (Kumar et al. 2009) predictions of damaging amino acid polymorphisms from dbNSFP version  
457 3.2a (Liu et al. 2016). We obtained Gene Ontology (GO) annotations from ENSEMBL release  
458 75 (Yates et al. 2016). We also downloaded coordinates of previously identified selective sweeps  
459 from dbPSHP (Li et al. 2013).

460 We used the UCSC Table Browser (Karolchik et al. 2004) to obtain the following data  
461 sets: phenotype-associated SNPs from the GWAS Catalog (accessed Apr 12, 2016; Welter et al.  
462 2014), ClinVar pathogenic SNPs and indels  $\leq 20$  bp in length (Apr 26, 2016; Landrum et al.  
463 2016), COSMIC somatic mutations in cancer (accessed Feb 25, 2014; Forbes et al. 2015),  
464 phastCons elements conserved across primates (accessed Jun 2, 2013; Siepel et al. 2005),  
465 ENCODE transcription factor binding sites version 3 (accessed Aug 25, 2013; Dunham et al.  
466 2012), tables of genes and SNPs implicated in Mendelian phenotypes from OMIM (accessed  
467 May 2, 2016; Amberger et al. 2015), and KEGG pathway annotations (accessed Apr 27, 2016;  
468 Kanehisa et al. 2015). For each of these data sets we used GRCh37/hg19 coordinates.

469 In order to examine the prevalence of selective sweeps within interacting gene networks,  
470 we downloaded physical and genetic interactions from BioGRID version 3.4.136 (Chatr-

471 Aryamontri et al. 2015). Our set of genetic interactions consisted of those annotated as “synthetic  
472 genetic interaction defined by inequality,” “suppressive genetic interaction defined by  
473 inequality,” or “additive genetic interaction defined by inequality.” Physical interactions  
474 included those annotated as “direct interaction,” “association,” or “physical association.” We  
475 extracted transcription factor-target interactions from ORegAnno (accessed Dec 22, 2015;  
476 Griffith et al. 2008), retaining only interacting pairs where the ENSEMBL gene identifier were  
477 provided for both genes in order to avoid ambiguity.

478

### 479 **Building classifiers to detect selective sweeps**

480 To detect sweeps we used S/HIC (<https://github.com/kern-lab/shIC>), a machine learning  
481 approach we previously described and showed to be remarkably powerful and robust to non-  
482 equilibrium demography (Schridder and Kern 2016). Briefly, the S/HIC machine learning  
483 approach leverages spatial patterns (along a genome) of a variety of population genetic summary  
484 statistics to classify genomic windows as being the target of a completed hard sweep (hard),  
485 being closely linked to a hard sweep (hard-linked), a completed soft sweep (soft), linked to a soft  
486 sweep (soft-linked), or evolving neutrally (neutral). While this classification approach allows  
487 inference when considering a large number of features jointly, it necessitates training from a  
488 large number of data instances known to belong to each class. Because the number of genomic  
489 windows known to belong to each our five classes is limited, we must rely on simulation to  
490 generate our training data. To this end we used the program discoal (Kern and Schridder 2016) to  
491 simulate large chromosomal regions, subdivided into 11 sub-windows. Training examples for the  
492 hard class experienced a hard sweep in the center of the central sub-window (i.e. the 6<sup>th</sup>  
493 window), while examples for the hard-linked class experienced a hard sweep in the center of one

494 of the remaining sub-windows (selected randomly). Analogous simulations with soft sweeps  
495 were generated for the soft and soft-linked classes, respectively. Finally, neutrally evolving  
496 examples did not experience any selective sweep.

497 We sought to train a classifier for each population under a demographic model that offers  
498 a better approximation to the population size history than the standard neutral model. For this we  
499 used Auton et al.'s (2015) population histories inferred by PSMC (Li and Durbin 2011). The  
500 1000 Genomes Project's PSMC output did not contain estimates of  $\theta$ , the population mutation  
501 rate parameter. Thus for each population we conducted a grid search by simulating genomic  
502 windows with the appropriate sample size under each demographic model with varying values of  
503  $\theta=4NuL$  (where  $L$  is the length of the locus, which we set to 100 kb); the grid of  $\theta$  values ranged  
504 from 10 to 250, examining multiples of 10. For each value of  $\theta$ , we compared the values of  $\pi$   
505 (Nei and Li 1979),  $\hat{\theta}_w$  (Watterson 1975),  $\hat{\theta}_H$  (Fay and Wu 2000),  $H_2/H_1$  (Garud et al. 2015), and  
506  $Z_{nS}$  (Kelly 1997) from 1000 simulations to those from 1000 randomly selected genomic loci  
507 (calculated as described below), calculating the mean of each statistic in the real and simulated  
508 datasets. We chose as the final values of  $\theta$  that for which the sum of the percent deviations of the  
509 simulated from the observed means of each statistic was minimized. This estimate of  $\theta$  allowed  
510 us to calculate estimated population sizes and times scaled by the number generations for each  
511 time point in the history inferred by PSMC. The harmonic mean of each population's size was  
512 calculated by taking the estimated population size for each of the last  $4N$  generations. We note  
513 that these models may not accurately capture the demographic histories of the populations we  
514 examined due to the confounding effects of positive (Schridder et al. 2016) and negative (Ewing  
515 and Jensen 2016) selection. However, because of S/HIC's robustness to demographic  
516 misspecification, we do not expect this to severely impact our analysis (Schridder and Kern 2016).

517 For each population we simulated a total of 2000 regions for each of our five classes. For  
518 simulations involving sweeps, we drew the selection coefficient from  $U(0.005, 0.1)$ , the sweep  
519 completion time from  $U(0, 2000)$ , the initial selected frequency for soft sweeps from  $U(1/N, 0.2)$ .  
520 We drew values of  $\theta$  uniformly from a range spanning exactly one order of magnitude, specified  
521 so that the mean value of  $\theta$  was equal to that estimated for the population as described above. We  
522 drew recombination rates from an exponential distribution with mean  $1 \times 10^{-8}$ , truncated at triple  
523 the mean due to memory constraints. The simulation program discoal requires some of these  
524 parameters to be scaled by the present-day effective population size; we did this by taking the  
525 mean value of  $\theta$  and dividing by  $4uL$ , where  $u$  was set to  $1.2 \times 10^{-8}$  (Kong et al. 2012). The full  
526 command lines we used to generate 1.1 Mb regions (to be subdivided into 11 windows each 100  
527 kb in length) for each population are shown in supplementary table S5. We also simulated 1000  
528 test examples for each population in the same manner as for the training data.

529 In order to address the potential for purifying and background selection to confound our  
530 classifiers, we simulated additional test sets of 1000 genomic windows 1.1 Mb in length with  
531 varying arrangements of selected sites. In order to mimic patterns of purifying/background  
532 selection expected in the human genome as closely as possible, for each of our 1000 replicates  
533 we randomly selected a 1.1 Mb window from the human genome and asked which sites were  
534 found within either a GENCODE exon (Harrow et al. 2012) or within a phastCons (Siepel et al.  
535 2005) conserved element from the UCSC Genome Browser's 100-way vertebrate alignment  
536 (Kent et al. 2002). Sites in the simulated chromosome corresponding to these functional elements  
537 in the human genome were labeled as "selected" in the simulations. In "selected" regions, 25%  
538 of all new mutations had no fitness effect, while the remaining 75% had a selection coefficient  
539 drawn from a gamma distribution with mean of  $-0.0294$  and a shape parameter of  $0.184$  (the



540 African model from Boyko et al. 2008). We limit fitness effects of new mutations to 75% in an  
541 effort to mimic coding regions of the genome. We note that this percentage may not be accurate  
542 for noncoding functional regions, though it is likely that some fraction of mutations in these  
543 regions is effectively neutral. All mutations outside of the selected regions were fitness-neutral.  
544 These simulations were performed for both our GWD and JPT demographic models using the  
545 fwdpy11 (<https://github.com/molpopgen/fwdpy11>) forward population genetic simulator  
546 (Thornton 2014), using the same mutation rates, recombination rates, and history of  
547 instantaneous population size changes as used in our coalescent simulations described in  
548 supplementary table S5. Feature vectors were then generated for each of these simulated test  
549 examples in the same manner as for our coalescent simulations. We also tested each population's  
550 classifier against test sets generated by discoal with different fixed values of  $\theta$  (but otherwise  
551 with the same parameterizations shown in supplementary table S5) in order to ensure that our  
552 approach was robust to uncertainty in the estimate of this parameter (supplementary fig. S4).

553 Our feature vector for each simulated region examined the spatial patters (following  
554 Schrider and Kern 2016) of each of the following statistics:  $\pi$  (Nei and Li 1979),  $\hat{\theta}_w$  (Watterson  
555 1975),  $\hat{\theta}_H$  (Fay and Wu 2000), the number of distinct haplotypes, average haplotype  
556 homozygosity, Garud et al.'s (2015)  $H_{12}$  and  $H_2/H_1$  statistics,  $Z_{nS}$ ,  $\omega$  (Kim and Nielsen 2004), and  
557 the maximum frequency of derived mutations (Li 2011). Before calculating these summary  
558 statistics we masked a number of sites within each simulation by randomly selecting a 1.1 Mb  
559 region from our empirical windows sampled throughout the genome and masking the same  
560 regions in the simulated window as were masked in the genomic window (see below). Thus our  
561 simulated windows exhibit the same distribution of regions of missing data as the windows to

562 which we applied our classifiers. We then used S/HIC to train extra-trees classifiers (Geurts et al.  
563 2006), one for each population.

564

### 565 **Classifying genomic windows in each population**

566 Having trained our classifiers, we then applied them to genomic data from the corresponding  
567 population. We inferred ancestral states of polymorphisms and masked inaccessible sites  
568 (whether polymorphic or not) in the same manner as described previously (Schridder and Kern  
569 2016). We then used S/HIC to classify the central 100 kb sub-window of 1.1 Mb windows across  
570 the autosomes, while taking the stringent approach of omitting those for which any sub-window  
571 was less than 25% accessible, before sliding 100 kb downstream to examine the next window.  
572 We also removed windows where any of the three central sub-windows had a mean  
573 recombination rate of zero (using data from Kong et al. 2010). Importantly, for each retained 1.1  
574 Mb window, we recorded the locations of all sites deemed inaccessible for use in masking our  
575 training data (see above). In total we classified 13,968 windows, accounting for 48.5% of the  
576 assembled autosomes. For our classifications we simply took the class that S/HIC's classifier  
577 inferred to be the most likely one, but we also used S/HIC's posterior class membership  
578 probability estimates in order to experiment with different confidence thresholds (results shown  
579 in supplementary table S2). For a given threshold, we required the sum of a windows' hard and  
580 soft sweep posterior probabilities to be greater than or equal to the threshold before labeling the  
581 window as a sweep; the mode of the sweep was that corresponding to the greater posterior  
582 probability among the hard and soft sweep classes.

583 In order to count the number of distinct sweep candidates found within our set of  
584 populations, we simply merged all 100 kb windows classified as a sweep of either type that were

585 located either at the exact same coordinates or adjacent to one another, repeating this until no  
586 more sweep regions could be merged. If all constituent windows were classified as soft, we  
587 counted the sweep as soft; otherwise we counted it as a hard sweep. We used a similar approach  
588 but examining classifications from only one population at a time in order to count the number of  
589 sweeps of each type in that population. If a gene found within a sweep window identified by  
590 S/HIC was not found in an entry of dbPSHP (Li et al. 2013), we referred to it as a novel sweep.  
591 Visualization of sweep candidates was performed using the UCSC Genome Browser (Kent et al.  
592 2002) , along with custom tracks showing values of various population genetic summary  
593 statistics and selection scan scores for the CEU, YRI, and JPT populations from the Human  
594 Positive Selection Browser (Pybus et al. 2013). Our classification results are available at  
595 <https://github.com/kern-lab/shIC/tree/master/humanScanResults>.

596

### 597 **Permutation tests for enrichment of annotation features in sweeps**

598 To determine whether certain annotation features were enriched within any of our five classes,  
599 we carefully designed a permutation test to account for the subset of the genome that we  
600 examined with S/HIC, as well as the spatial correlation of S/HIC's classifications (i.e. adjacent  
601 windows are especially likely to receive the same classification). Briefly, the permutation  
602 algorithm begins by examining our classification results for a given population and keeping track  
603 of the length of runs of consecutive windows assigned to each class. The permutation algorithm  
604 then selects a chromosome, and begins at its first classified window (i.e. not removed by data  
605 filtering). A run length and associated class assignment is then randomly drawn without  
606 replacement. This process continues until the end of the chromosome, and then another  
607 chromosome is selected until the end of the final chromosome is reached, at which point the

608 permutation has been completed. We then repeated this permutation procedure 10,000 times for  
609 each population. Note that this process preserves the run length distribution of our classifications  
610 while permuting them across the set of genomic windows that had enough unmasked data to be  
611 included in our scan.

612         After constructing our permuted data sets, we conducted one-sided enrichment tests by  
613 counting the number of base pairs in the intersection between the S/HIC class of interest and the  
614 annotation feature of interest, and comparing this number to its distribution among the permuted  
615 data sets. The fraction of permuted data sets where this intersect was greater than or equal to that  
616 observed for the real data is the  $p$ -value. Because we tested each of S/HIC's five classes for  
617 enrichment of a fairly large number of genomic features (supplementary table S3), we corrected  
618 for multiple testing using false discovery rate  $q$ -values following Storey (2002). When testing  
619 GO terms and KEGG pathways for enrichment, we considered only the hard and soft sweep  
620 classes, corrected for calculating  $q$ -values separately for each class.

621         We also asked whether the number of pairs of interacting genes both overlapping  
622 windows classified as sweeps was greater than in our permuted data sets. To ensure that our  
623 results were not inflated by the spatial clustering of interacting genes, we only counted  
624 interacting pairs overlapping sweep windows if they were separated by at least 10 Mb or on  
625 separate chromosomes. In addition, if we observed an interaction between two genes,  $A$  and  $B$ ,  
626 that each overlapped sweeps, and a third sweep candidate gene,  $C$ , was found, to avoid  
627 redundancy we counted at most one interaction between  $A$  and  $C$  and  $B$  and  $C$ , even if  $C$  was  
628 found interact with both other genes. As with GO and KEGG terms, we only searched the hard  
629 and soft classes for enrichments before calculating one-sided  $q$ -values as described above.

630

631 **ACKNOWLEDGMENTS**

632 We thank Matthew Hahn, David Enard, and three anonymous reviewers for feedback on the  
633 manuscript. D.R.S. was supported in part by NIH award no. K99HG008696. A.D.K. was  
634 supported in part by NIH award no. R01GM078204.

635

636 **REFERENCES**

637

638 Akey JM. 2009. Constructing genomic maps of positive selection in humans: Where do we go from here?  
639 *Genome Res* 19: 711-722.

640 Alexander DH, Novembre J and Lange K. 2009. Fast model-based estimation of ancestry in unrelated  
641 individuals. *Genome Res* 19: 1655-1664.

642 Allinen M, Peri L, Kujala S, Lahti-Domenici J, Outila K, Karppinen SM, Launonen V and Winqvist R.  
643 2002. Analysis of 11q21–24 loss of heterozygosity candidate target genes in breast cancer:  
644 indications of TSLC1 promoter hypermethylation. *Genes Chromosomes Cancer* 34: 384-389.

645 Amberger JS, Bocchini CA, Schiettecatte F, Scott AF and Hamosh A. 2015. OMIM. org: Online  
646 Mendelian Inheritance in Man (OMIM®), an online catalog of human genes and genetic  
647 disorders. *Nucleic Acids Res* 43: D789-D798.

648 Andolfatto P. 2007. Hitchhiking effects of recurrent beneficial amino acid substitutions in the *Drosophila*  
649 *melanogaster* genome. *Genome Res* 17: 1755-1762.

650 Auton A, Brooks LD, Durbin RM, et al. 2015. A global reference for human genetic variation. *Nature*  
651 526: 68-74.

652 Begun DJ, Holloway AK, Stevens K, et al. 2007. Population genomics: whole-genome analysis of  
653 polymorphism and divergence in *Drosophila simulans*. *PLoS Biol* 5: e310.

654 Berg JJ and Coop G. 2014. A population genetic signal of polygenic adaptation. *PLoS Genet* 10:  
655 e1004412.

656 Berg JJ and Coop G. 2015. A Coalescent Model for a Sweep of a Unique Standing Variant. *Genetics*  
657 201: 707-725.

658 Birky CW and Walsh JB. 1988. Effects of linkage on rates of molecular evolution. *Proceedings of the*  
659 *National Academy of Sciences* 85: 6414-6418.

660 Boyko AR, Williamson SH, Indap AR, et al. 2008. Assessing the evolutionary impact of amino acid  
661 mutations in the human genome. *PLoS Genet* 4: e1000083.

662 Bryk J, Hardouin E, Pugach I, Hughes D, Strotmann R, Stoneking M and Myles S. 2008. Positive  
663 selection in East Asians for an EDAR allele that enhances NF- $\kappa$ B activation. *PLoS ONE* 3:  
664 e2209.

665 Charlesworth B, Morgan M and Charlesworth D. 1993. The effect of deleterious mutations on neutral  
666 molecular variation. *Genetics* 134: 1289-1303.

667 Chatr-Aryamontri A, Breitkreutz B-J, Oughtred R, et al. 2015. The BioGRID interaction database: 2015  
668 update. *Nucleic Acids Res* 43: D470-D478.

- 669 Chun S and Fay JC. 2011. Evidence for hitchhiking of deleterious mutations within the human genome.  
670 *PLoS Genet* 7: e1002240.
- 671 Cotney J, Leng J, Yin J, Reilly SK, DeMare LE, Emera D, Ayoub AE, Rakic P and Noonan JP. 2013. The  
672 Evolution of Lineage-Specific Regulatory Activities in the Human Embryonic Limb. *Cell* 154:  
673 185-196.
- 674 Dunham I, Kundaje A, Aldred SF, et al. 2012. An integrated encyclopedia of DNA elements in the human  
675 genome. *Nature* 489: 57-74.
- 676 Enard D, Cai L, Gwennap C and Petrov DA. 2016. Viruses are a dominant driver of protein adaptation in  
677 mammals. *eLife* 5: e12469.
- 678 Enard D, Messer PW and Petrov DA. 2014. Genome-wide signals of positive selection in human  
679 evolution. *Genome Res* 24: 885-895.
- 680 Ewing GB and Jensen JD. 2016. The consequences of not accounting for background selection in  
681 demographic inference. *Mol Ecol* 25: 135-141.
- 682 Fagundes NJ, Ray N, Beaumont M, Neuenschwander S, Salzano FM, Bonatto SL and Excoffier L. 2007.  
683 Statistical evaluation of alternative models of human evolution. *Proceedings of the National*  
684 *Academy of Sciences* 104: 17614-17619.
- 685 Fan S, Hansen ME, Lo Y and Tishkoff SA. 2016. Going global by adapting local: A review of recent  
686 human adaptation. *Science* 354: 54-59.
- 687 Faraji F, Pang Y, Walker RC, Borges RN, Yang L and Hunter KW. 2012. Cadm1 is a metastasis  
688 susceptibility gene that suppresses metastasis by modifying tumor interaction with the cell-  
689 mediated immunity. *PLoS Genet* 8: e1002926.
- 690 Fay JC and Wu C-I. 2000. Hitchhiking under positive Darwinian selection. *Genetics* 155: 1405-1413.
- 691 Field Y, Boyle EA, Telis N, et al. 2016. Detection of human adaptation during the past 2000 years.  
692 *Science* 354: 760-764.
- 693 Forbes SA, Beare D, Gunasekaran P, et al. 2015. COSMIC: exploring the world's knowledge of somatic  
694 mutations in human cancer. *Nucleic Acids Res* 43: D805-D811.
- 695 Fu Y-X. 1997. Statistical tests of neutrality of mutations against population growth, hitchhiking and  
696 background selection. *Genetics* 147: 915-925.
- 697 Fujita E, Dai H, Tanabe Y, Zhiling Y, Yamagata T, Miyakawa T, Tanokura M, Momoi M and Momoi T.  
698 2010. Autism spectrum disorder is related to endoplasmic reticulum stress induced by mutations  
699 in the synaptic cell adhesion molecule, CADM1. *Cell death & disease* 1: e47.
- 700 Fujita E, Tanabe Y, Imhof BA, Momoi MY and Momoi T. 2012. A complex of synaptic adhesion  
701 molecule CADM1, a molecule related to autism spectrum disorder, with MUPP1 in the  
702 cerebellum. *J Neurochem* 123: 886-894.
- 703 Fukuhara H, Kuramochi M, Fukami T, et al. 2002. Promoter methylation of TSLC1 and tumor  
704 suppression by its gene product in human prostate cancer. *Jpn J Cancer Res* 93: 605-609.
- 705 Garud NR, Messer PW, Buzbas EO and Petrov DA. 2015. Recent selective sweeps in North American  
706 *Drosophila melanogaster* show signatures of soft sweeps. *PLoS Genet* 11: e1005004.
- 707 Gazave E, Ma L, Chang D, et al. 2014. Neutral genomic regions refine models of recent rapid human  
708 population growth. *Proceedings of the National Academy of Sciences* 111: 757-762.
- 709 Geurts P, Ernst D and Wehenkel L. 2006. Extremely randomized trees. *Machine Learning* 63: 3-42.
- 710 Gillespie JH. 1991. The causes of molecular evolution. Oxford: Oxford University Press.
- 711 Gillespie JH. 2000. Genetic drift in an infinite population: the pseudohitchhiking model. *Genetics* 155:  
712 909-919.



- 713 Gravel S, Henn BM, Gutenkunst RN, et al. 2011. Demographic history and rare allele sharing among  
714 human populations. *Proceedings of the National Academy of Sciences* 108: 11983-11988.
- 715 Griffith OL, Montgomery SB, Bernier B, et al. 2008. ORegAnno: an open-access community-driven  
716 resource for regulatory annotation. *Nucleic Acids Res* 36: D107-D113.
- 717 Harrow J, Frankish A, Gonzalez JM, et al. 2012. GENCODE: The reference human genome annotation  
718 for The ENCODE Project. *Genome Res* 22: 1760-1774.
- 719 Hartfield M and Otto SP. 2011. Recombination and hitchhiking of deleterious alleles. *Evolution* 65:  
720 2421-2434.
- 721 Helgason A, Pálsson S, Thorleifsson G, et al. 2007. Refining the impact of TCF7L2 gene variants on type  
722 2 diabetes and adaptive evolution. *Nat Genet* 39: 218-225.
- 723 Hermisson J and Pennings PS. 2005. Soft sweeps molecular population genetics of adaptation from  
724 standing genetic variation. *Genetics* 169: 2335-2352.
- 725 Hernandez RD, Kelley JL, Elyashiv E, Melton SC, Auton A, McVean G, Sella G and Przeworski M.  
726 2011. Classic selective sweeps were rare in recent human evolution. *Science* 331: 920-924.
- 727 Huerta-Sánchez E, Jin X, Bianba Z, et al. 2014. Altitude adaptation in Tibetans caused by introgression of  
728 Denisovan-like DNA. *Nature* 512: 194-197.
- 729 Huff CD, Witherspoon DJ, Zhang Y, et al. 2012. Crohn's disease and genetic hitchhiking at IBD5. *Mol*  
730 *Biol Evol* 29: 101-111.
- 731 Innan H and Kim Y. 2004. Pattern of polymorphism after strong artificial selection in a domestication  
732 event. *Proc Natl Acad Sci U S A* 101: 10667-10672.
- 733 Jensen JD, Thornton KR and Andolfatto P. 2008. An approximate Bayesian estimator suggests strong,  
734 recurrent selective sweeps in *Drosophila*. *PLoS Genet* 4: e1000198.
- 735 Jones DA and Wakeley J. 2008. The influence of gene conversion on linkage disequilibrium around a  
736 selective sweep. *Genetics* 180: 1251-1259.
- 737 Kanehisa M, Sato Y, Kawashima M, Furumichi M and Tanabe M. 2015. KEGG as a reference resource  
738 for gene and protein annotation. *Nucleic Acids Res*: gkv1070.
- 739 Kaplan NL, Hudson R and Langley C. 1989. The "hitchhiking effect" revisited. *Genetics* 123: 887-899.
- 740 Karasov T, Messer PW and Petrov DA. 2010. Evidence that adaptation in *Drosophila* is not limited by  
741 mutation at single sites. *PLoS Genet* 6: e1000924.
- 742 Karolchik D, Hinrichs AS, Furey TS, Roskin KM, Sugnet CW, Haussler D and Kent WJ. 2004. The  
743 UCSC Table Browser data retrieval tool. *Nucleic Acids Res* 32: D493-D496.
- 744 Kelly JK. 1997. A test of neutrality based on interlocus associations. *Genetics* 146: 1197-1206.
- 745 Kent WJ. 2002. BLAT—the BLAST-like alignment tool. *Genome Res* 12: 656-664.
- 746 Kent WJ, Sugnet CW, Furey TS, Roskin KM, Pringle TH, Zahler AM and Haussler D. 2002. The human  
747 genome browser at UCSC. *Genome Res* 12: 996-1006.
- 748 Kern AD, Jones CD and Begun DJ. 2002. Genomic effects of nucleotide substitutions in *Drosophila*  
749 *simulans*. *Genetics* 162: 1753-1761.
- 750 Kern AD and Schrider DR. 2016. discoal: flexible coalescent simulations with selection. *Bioinformatics*:  
751 btw556.
- 752 Kim Y and Nielsen R. 2004. Linkage disequilibrium as a signature of selective sweeps. *Genetics* 167:  
753 1513-1524.
- 754 Kim Y and Stephan W. 2002. Detecting a local signature of genetic hitchhiking along a recombining  
755 chromosome. *Genetics* 160: 765-777.

- 756 Kohda K, Kamiya Y, Matsuda S, Kato K, Umemori H and Yuzaki M. 2003. Heteromer formation of  $\delta 2$   
757 glutamate receptors with AMPA or kainate receptors. *Molecular Brain Research* 110: 27-37.
- 758 Kong A, Frigge ML, Masson G, et al. 2012. Rate of *de novo* mutations and the importance of father's age  
759 to disease risk. *Nature* 488: 471-475.
- 760 Kong A, Thorleifsson G, Gudbjartsson DF, et al. 2010. Fine-scale recombination rate differences between  
761 sexes, populations and individuals. *Nature* 467: 1099-1103.
- 762 Kumar P, Henikoff S and Ng PC. 2009. Predicting the effects of coding non-synonymous variants on  
763 protein function using the SIFT algorithm. *Nat Protoc* 4: 1073-1081.
- 764 Kuramochi M, Fukuhara H, Nobukuni T, et al. 2001. TSLC1 is a tumor-suppressor gene in human non-  
765 small-cell lung cancer. *Nat Genet* 27: 427-430.
- 766 Lander ES, Linton LM, Birren B, et al. 2001. Initial sequencing and analysis of the human genome.  
767 *Nature* 409: 860-921.
- 768 Landrum MJ, Lee JM, Benson M, et al. 2016. ClinVar: public archive of interpretations of clinically  
769 relevant variants. *Nucleic Acids Res* 44: D862-D868.
- 770 Langley CH, Stevens K, Cardeno C, et al. 2012. Genomic variation in natural populations of *Drosophila*  
771 *melanogaster*. *Genetics* 192: 533-598.
- 772 Lee YCG, Langley CH and Begun DJ. 2013. Differential strengths of positive selection revealed by  
773 hitchhiking effects at small physical scales in *Drosophila melanogaster*. *Mol Biol Evol*: mst270.
- 774 Li H. 2011. A new test for detecting recent positive selection that is free from the confounding impacts of  
775 demography. *Mol Biol Evol* 28: 365-375.
- 776 Li H and Durbin R. 2011. Inference of human population history from individual whole-genome  
777 sequences. *Nature* 475: 493-496.
- 778 Li MJ, Wang LY, Xia Z, Wong MP, Sham PC and Wang J. 2013. dbPSHP: a database of recent positive  
779 selection across human populations. *Nucleic Acids Res*: gkt1052.
- 780 Lin K, Li H, Schlötterer C and Futschik A. 2011. Distinguishing positive selection from neutral evolution:  
781 boosting the performance of summary statistics. *Genetics* 187: 229-244.
- 782 Liu X, Somel M, Tang L, et al. 2012. Extension of cortical synaptic development distinguishes humans  
783 from chimpanzees and macaques. *Genome Res* 22: 611-622.
- 784 Liu X, Wu C, Li C and Boerwinkle E. 2016. dbNSFP v3. 0: A One-Stop Database of Functional  
785 Predictions and Annotations for Human Nonsynonymous and Splice-Site SNVs. *Hum Mutat* 37:  
786 235-241.
- 787 Lohmueller KE, Albrechtsen A, Li Y, et al. 2011. Natural selection affects multiple aspects of genetic  
788 variation at putatively neutral sites across the human genome. *PLoS Genet* 7: e1002326.
- 789 Lonsdale J, Thomas J, Salvatore M, et al. 2013. The genotype-tissue expression (GTEx) project. *Nat*  
790 *Genet* 45: 580-585.
- 791 Luján R, Shigemoto R and Lopez-Bendito G. 2005. Glutamate and GABA receptor signalling in the  
792 developing brain. *Neuroscience* 130: 567-580.
- 793 Macpherson JM, Sella G, Davis JC and Petrov DA. 2007. Genomewide spatial correspondence between  
794 nonsynonymous divergence and neutral polymorphism reveals extensive adaptation in  
795 *Drosophila*. *Genetics* 177: 2083-2099.
- 796 Marsden CD, Ortega-Del Vecchyo D, O'Brien DP, et al. 2016. Bottlenecks and selective sweeps during  
797 domestication have increased deleterious genetic variation in dogs. *Proceedings of the National*  
798 *Academy of Sciences* 113: 152-157.



- 799 Marth GT, Czabarka E, Murvai J and Sherry ST. 2004. The allele frequency spectrum in genome-wide  
800 human variation data reveals signals of differential demographic history in three large world  
801 populations. *Genetics* 166: 351-372.
- 802 Maynard Smith J and Haigh J. 1974. The hitch-hiking effect of a favourable gene. *Genet Res* 23: 23-35.
- 803 Meyer KA, Marques-Bonet T and Sestan N. 2017. Differential Gene Expression in the Human Brain Is  
804 Associated with Conserved, but not Accelerated, Noncoding Sequences. *Mol Biol Evol* 34: 1217-  
805 1229.
- 806 Nei M and Li W-H. 1979. Mathematical model for studying genetic variation in terms of restriction  
807 endonucleases. *Proceedings of the National Academy of Sciences* 76: 5269-5273.
- 808 Nielsen R, Bustamante C, Clark AG, et al. 2005a. A scan for positively selected genes in the genomes of  
809 humans and chimpanzees. *PLoS Biol* 3: e170.
- 810 Nielsen R, Williamson S, Kim Y, Hubisz MJ, Clark AG and Bustamante C. 2005b. Genomic scans for  
811 selective sweeps using SNP data. *Genome Res* 15: 1566-1575.
- 812 Nunney L and Muir B. 2015. Peto's paradox and the hallmarks of cancer: constructing an evolutionary  
813 framework for understanding the incidence of cancer. *Phil Trans R Soc B* 370: 20150161.
- 814 Orr HA and Betancourt AJ. 2001. Haldane's sieve and adaptation from the standing genetic variation.  
815 *Genetics* 157: 875-884.
- 816 Orr HA and Unckless RL. 2014. The population genetics of evolutionary rescue. *PLoS Genet* 10:  
817 e1004551.
- 818 Pavlidis P, Jensen JD and Stephan W. 2010. Searching for footprints of positive selection in whole-  
819 genome SNP data from nonequilibrium populations. *Genetics* 185: 907-922.
- 820 Pei B, Sisu C, Frankish A, et al. 2012. The GENCODE pseudogene resource. *Genome Biol* 13: 1.
- 821 Pennings PS and Hermisson J. 2006a. Soft sweeps II—molecular population genetics of adaptation from  
822 recurrent mutation or migration. *Mol Biol Evol* 23: 1076-1084.
- 823 Pennings PS and Hermisson J. 2006b. Soft sweeps III: the signature of positive selection from recurrent  
824 mutation. *PLoS Genet* 2: e186.
- 825 Peter BM, Huerta-Sanchez E and Nielsen R. 2012. Distinguishing between selective sweeps from  
826 standing variation and from a *de novo* mutation. *PLoS Genet* 8: e1003011.
- 827 Pickrell JK, Coop G, Novembre J, et al. 2009. Signals of recent positive selection in a worldwide sample  
828 of human populations. *Genome Res* 19: 826-837.
- 829 Przeworski M, Coop G and Wall JD. 2005. The signature of positive selection on standing genetic  
830 variation. *Evolution* 59: 2312-2323.
- 831 Pybus M, Dall'Olio GM, Luisi P, Uzkudun M, Carreño-Torres A, Pavlidis P, Laayouni H, Bertranpetit J  
832 and Engelken J. 2013. 1000 Genomes Selection Browser 1.0: a genome browser dedicated to  
833 signatures of natural selection in modern humans. *Nucleic Acids Res*: gkt1188.
- 834 Pybus M, Luisi P, Dall'Olio GM, Uzkudun M, Laayouni H, Bertranpetit J and Engelken J. 2015.  
835 Hierarchical boosting: a machine-learning framework to detect and classify hard selective sweeps  
836 in human populations. *Bioinformatics*: btv493.
- 837 Qian W, Zhou H and Tang K. 2015. Recent Coselection in Human Populations Revealed by Protein-  
838 Protein Interaction Network. *Genome Biol Evol* 7: 136-153.
- 839 Ronen R, Udpa N, Halperin E and Bafna V. 2013. Learning natural selection from the site frequency  
840 spectrum. *Genetics* 195: 181-193.
- 841 Ruwende C, Khoo S, Snow R, et al. 1995. Natural selection of hemi- and heterozygotes for G6PD  
842 deficiency in Africa by resistance to severe malaria. *Nature* 376: 246-249.

- 843 Sabeti PC, Reich DE, Higgins JM, et al. 2002. Detecting recent positive selection in the human genome  
844 from haplotype structure. *Nature* 419: 832-837.
- 845 Sabeti PC, Varilly P, Fry B, et al. 2007. Genome-wide detection and characterization of positive selection  
846 in human populations. *Nature* 449: 913-918.
- 847 Sattath S, Elyashiv E, Kolodny O, Rinott Y and Sella G. 2011. Pervasive adaptive protein evolution  
848 apparent in diversity patterns around amino acid substitutions in *Drosophila simulans*. *PLoS*  
849 *Genet* 7: e1001302.
- 850 Schrider DR and Kern AD. 2015. Inferring selective constraint from population genomic data suggests  
851 recent regulatory turnover in the human brain. *Genome Biol Evol* 7: 3511-3528.
- 852 Schrider DR and Kern AD. 2016. S/HIC: Robust Identification of Soft and Hard Sweeps Using Machine  
853 Learning. *PLoS Genet* 12: e1005928.
- 854 Schrider DR, Mendes FK, Hahn MW and Kern AD. 2015. Soft shoulders ahead: spurious signatures of  
855 soft and partial selective sweeps result from linked hard sweeps. *Genetics* 200: 267-284.
- 856 Schrider DR, Shanku AG and Kern AD. 2016. Effects of Linked Selective Sweeps on Demographic  
857 Inference and Model Selection. *Genetics* 204: 1207-1223.
- 858 Sheehan S and Song YS. 2016. Deep learning for population genetic inference. *PLoS Comput Biol* 12:  
859 e1004845.
- 860 Siepel A, Bejerano G, Pedersen JS, et al. 2005. Evolutionarily conserved elements in vertebrate, insect,  
861 worm, and yeast genomes. *Genome Res* 15: 1034-1050.
- 862 Stephan W, Wiehe TH and Lenz MW. 1992. The effect of strongly selected substitutions on neutral  
863 polymorphism: analytical results based on diffusion theory. *Theor Popul Biol* 41: 237-254.
- 864 Stephens JC, Reich DE, Goldstein DB, et al. 1998. Dating the origin of the CCR5-Δ32 AIDS-resistance  
865 allele by the coalescence of haplotypes. *The American Journal of Human Genetics* 62: 1507-  
866 1515.
- 867 Storey JD. 2002. A direct approach to false discovery rates. *Journal of the Royal Statistical Society:*  
868 *Series B (Statistical Methodology)* 64: 479-498.
- 869 Swanson WJ and Vacquier VD. 2002. The rapid evolution of reproductive proteins. *Nature Reviews*  
870 *Genetics* 3: 137-144.
- 871 Tajima F. 1989. Statistical method for testing the neutral mutation hypothesis by DNA polymorphism.  
872 *Genetics* 123: 585-595.
- 873 Thornton KR. 2014. A C++ template library for efficient forward-time population genetic simulation of  
874 large populations. *Genetics* 198: 157-166.
- 875 Tishkoff SA, Reed FA, Ranciaro A, et al. 2007. Convergent adaptation of human lactase persistence in  
876 Africa and Europe. *Nat Genet* 39: 31-40.
- 877 UK10K Consortium. 2015. The UK10K project identifies rare variants in health and disease. *Nature* 526:  
878 82-90.
- 879 Van Der Weyden L, Arends MJ, Chausiaux OE, et al. 2006. Loss of TSLC1 causes male infertility due to  
880 a defect at the spermatid stage of spermatogenesis. *Mol Cell Biol* 26: 3595-3609.
- 881 Voight BF, Kudaravalli S, Wen X and Pritchard JK. 2006. A map of recent positive selection in the  
882 human genome. *PLoS Biol* 4: e72.
- 883 Watterson G. 1975. On the number of segregating sites in genetical models without recombination. *Theor*  
884 *Popul Biol* 7: 256-276.
- 885 Welter D, MacArthur J, Morales J, et al. 2014. The NHGRI GWAS Catalog, a curated resource of SNP-  
886 trait associations. *Nucleic Acids Res* 42: D1001-D1006.

887 Wiehe T and Stephan W. 1993. Analysis of a genetic hitchhiking model, and its application to DNA  
888 polymorphism data from *Drosophila melanogaster*. *Mol Biol Evol* 10: 842-854.  
889 Williamson SH, Hubisz MJ, Clark AG, Payseur BA, Bustamante CD and Nielsen R. 2007. Localizing  
890 recent adaptive evolution in the human genome. *PLoS Genet* 3: e90.  
891 Wilson BA, Petrov DA and Messer PW. 2014. Soft selective sweeps in complex demographic scenarios.  
892 *Genetics* 198: 669-684.  
893 Wu YY, Yang Y, Xu YD and Yu HL. 2015. Targeted disruption of the spermatid-specific gene *Spata31*  
894 causes male infertility. *Mol Reprod Dev* 82: 432-440.  
895 Yates A, Akanni W, Amode MR, et al. 2016. Ensembl 2016. *Nucleic Acids Res* 44: D710-D716.  
896 Zhang P, Si X, Skogerbø G, et al. 2014. piRBase: a web resource assisting piRNA functional study.  
897 *Database* 2014: bau110.  
898 Zhiling Y, Fujita E, Tanabe Y, Yamagata T, Momoi T and Momoi MY. 2008. Mutations in the gene  
899 encoding *CADM1* are associated with autism spectrum disorder. *Biochem Biophys Res Commun*  
900 377: 926-929.

901  
902  
903  
904  
905  
906  
907  
908

909 **Table 1: Number of sweeps of each type detected in each population sample.**

910

| Population                          | # of Hard Sweeps | # of Soft Sweeps | Total # of Sweeps |
|-------------------------------------|------------------|------------------|-------------------|
| JPT (Tokyo, Japan)                  | 61 (5.8%)        | 998 (94.2%)      | 1,059             |
| CEU (Utah, United States)           | 66 (6.5%)        | 947 (93.5%)      | 1,013             |
| PEL (Lima, Peru)                    | 32 (4.7%)        | 655 (95.3%)      | 687               |
| GWD (Western Divisions, the Gambia) | 5 (0.6%)         | 795 (99.4%)      | 800               |
| YRI (Ibadan, Nigeria)               | 13 (1.6%)        | 797 (98.4%)      | 810               |
| LWK (Webuye, Kenya)                 | 3 (0.4%)         | 805 (99.6%)      | 808               |

911  
912

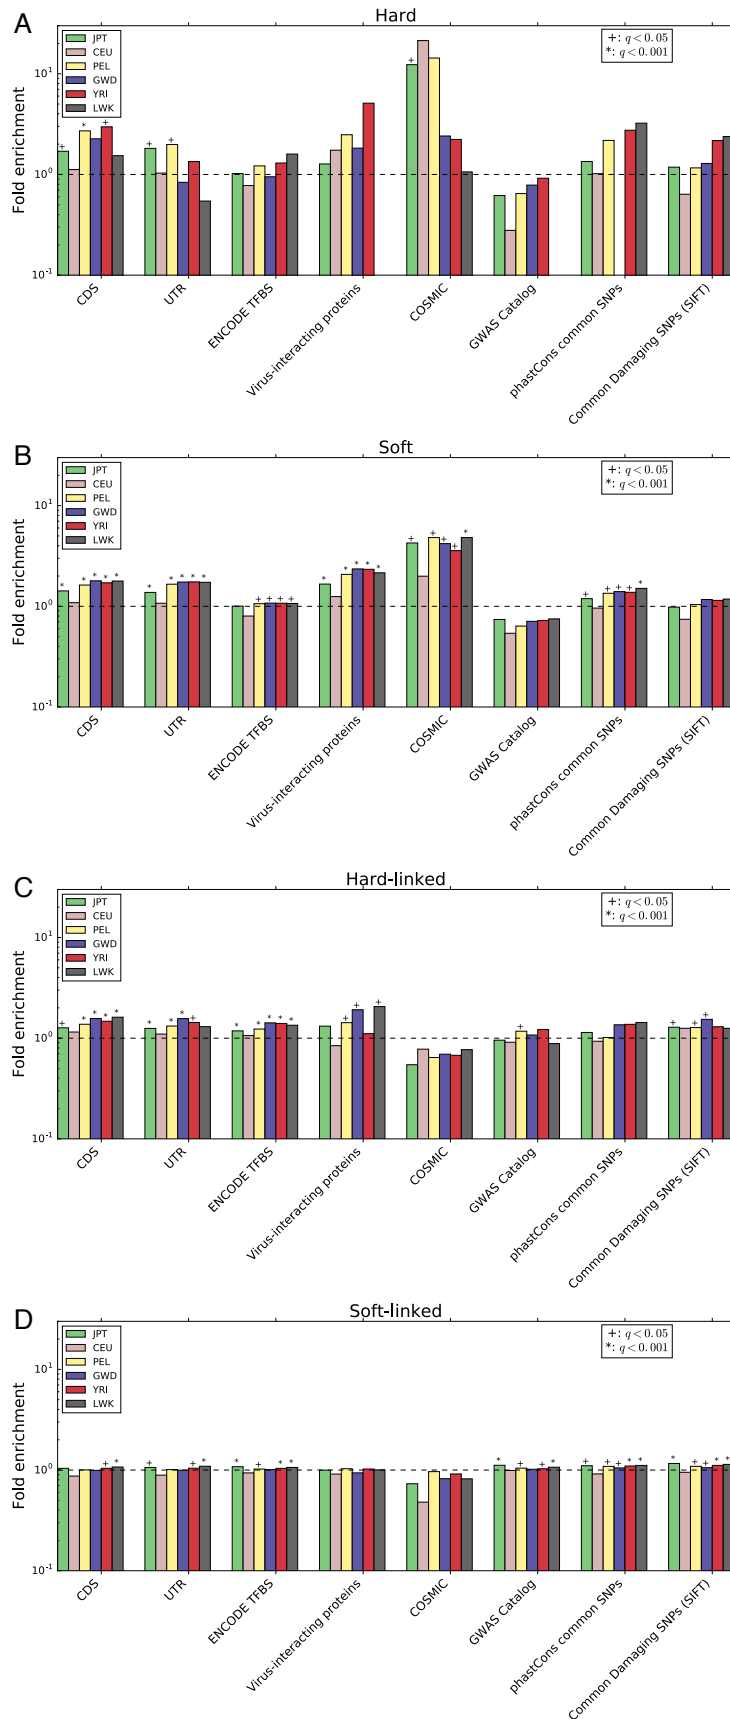

**Figure 1: Enrichment of various annotation features in regions classified as sweeps or linked to sweeps relative.** The fold enrichment is the ratio of the number of base pairs in the intersection between windows assigned to a given class and an annotation feature divided by the mean of this intersection across the permuted data sets (Methods). This was calculated separately for each population. (A) Enrichment of elements in windows classified as hard sweeps. (B) Same as A, but for soft sweeps. (C) Enrichment of elements in windows classified as affected by linked hard sweeps. (D) Linked soft sweeps.

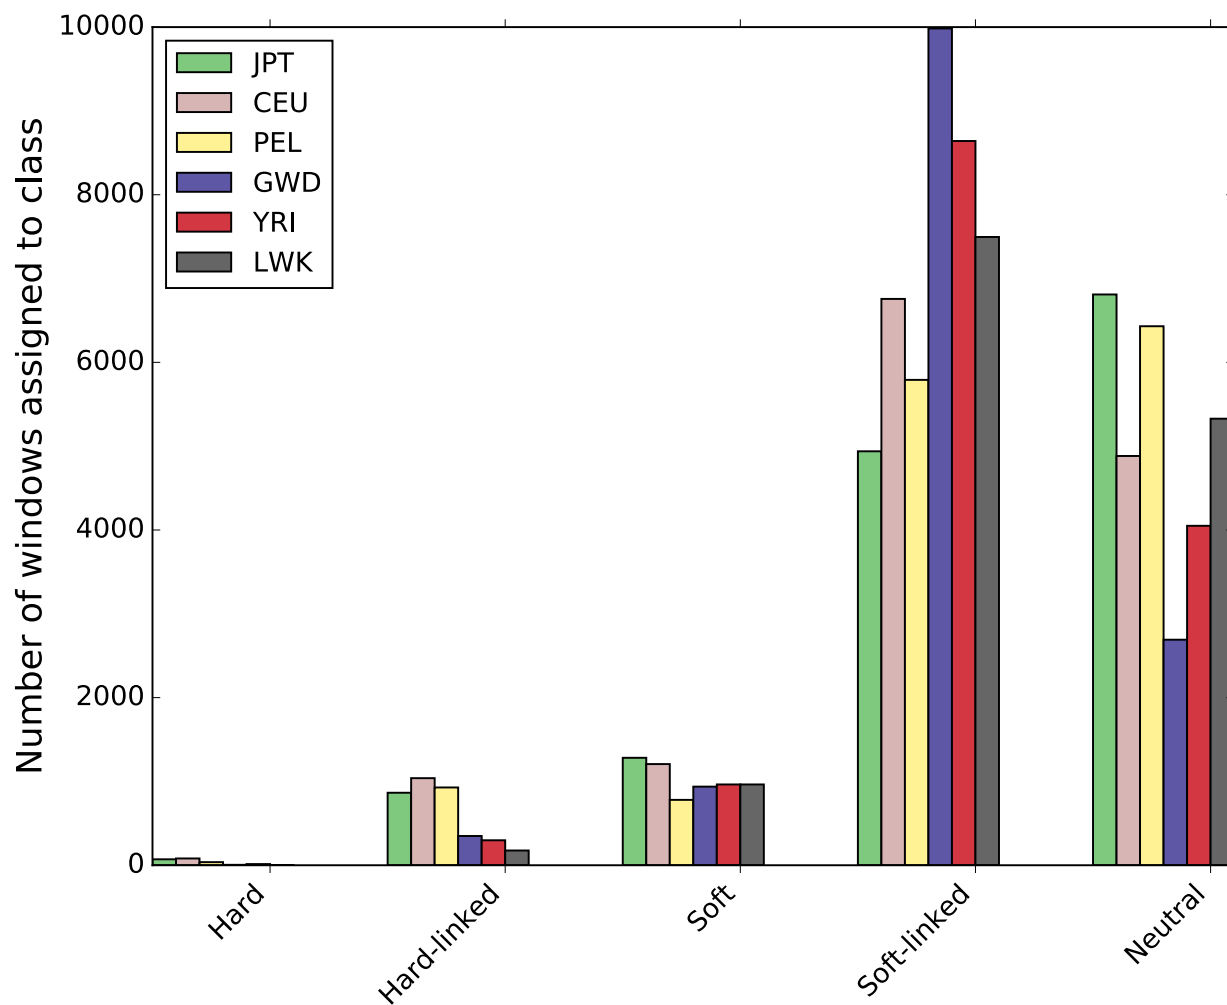

923  
924  
925  
926

**Figure 2: The number of windows assigned to each class by S/HIC in each population.**

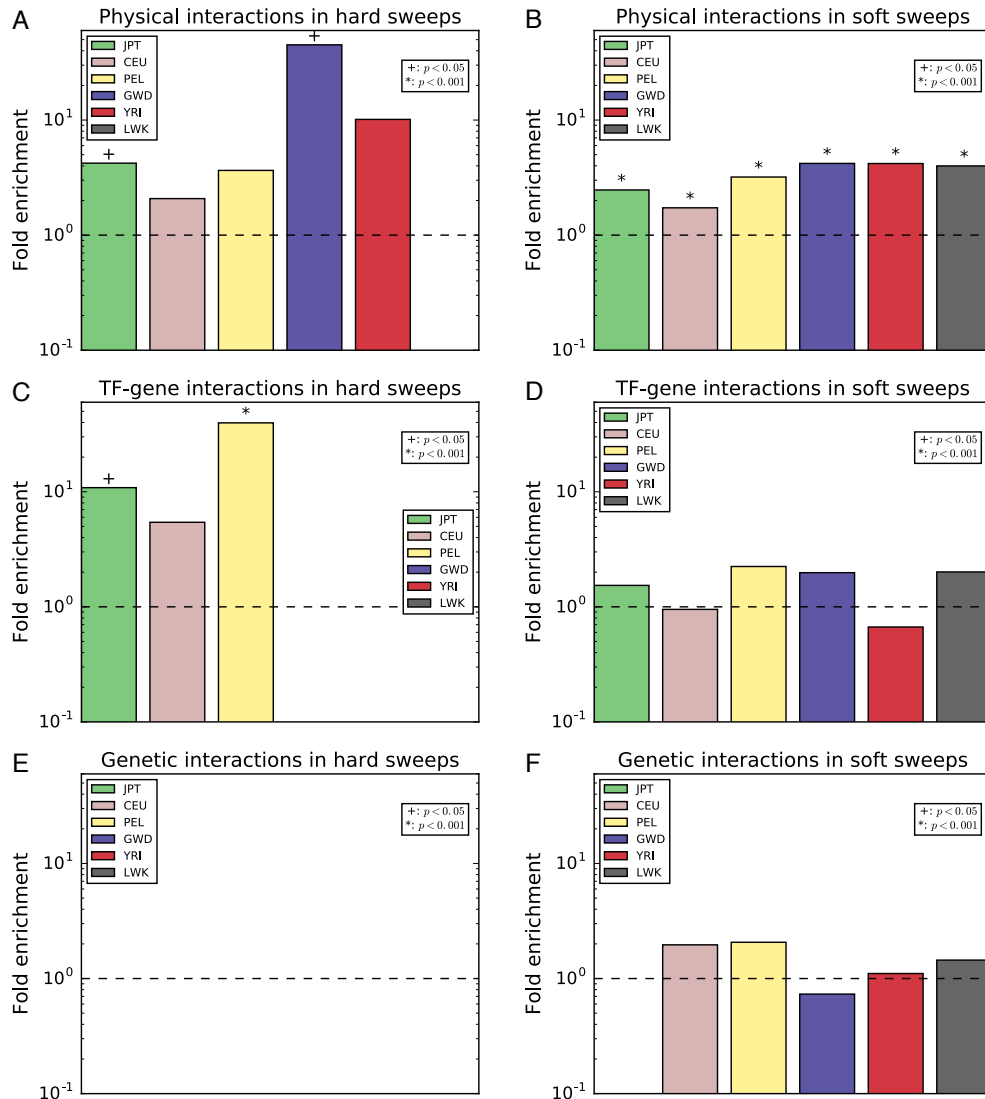

927  
 928 **Figure 3: Enrichment of pairs of interacting genes each falling within a window classified**  
 929 **as a sweep.** The fold enrichment is the ratio of the number of pairs of interacting genes  
 930 overlapping a window classified as a sweep of a given type divided by the mean of this number  
 931 across the permuted data sets (Methods). This was calculated separately for each population.  
 932 When no pairs of interacting sweep genes were observed in our true data set or a population, no  
 933 bar was drawn. (A) Enrichment of pairs of genes encoding protein products that physically  
 934 interact with each other (data from BioGRID) and both overlap hard sweep windows. (B) Same  
 935 as A, but for soft sweeps. (C) Enrichment of pairs of genes, one of which encodes a  
 936 transcription factor that affects expression of the other (data from ORegAnno), where both  
 937 overlap hard sweep windows. (D) Same as D, but for soft sweeps. (E) Enrichment of pairs of  
 938 genes for which a genetic interaction has been observed (data from BioGRID) and both overlap  
 939 hard sweep windows. (F) Same as E, but for soft sweeps.

940

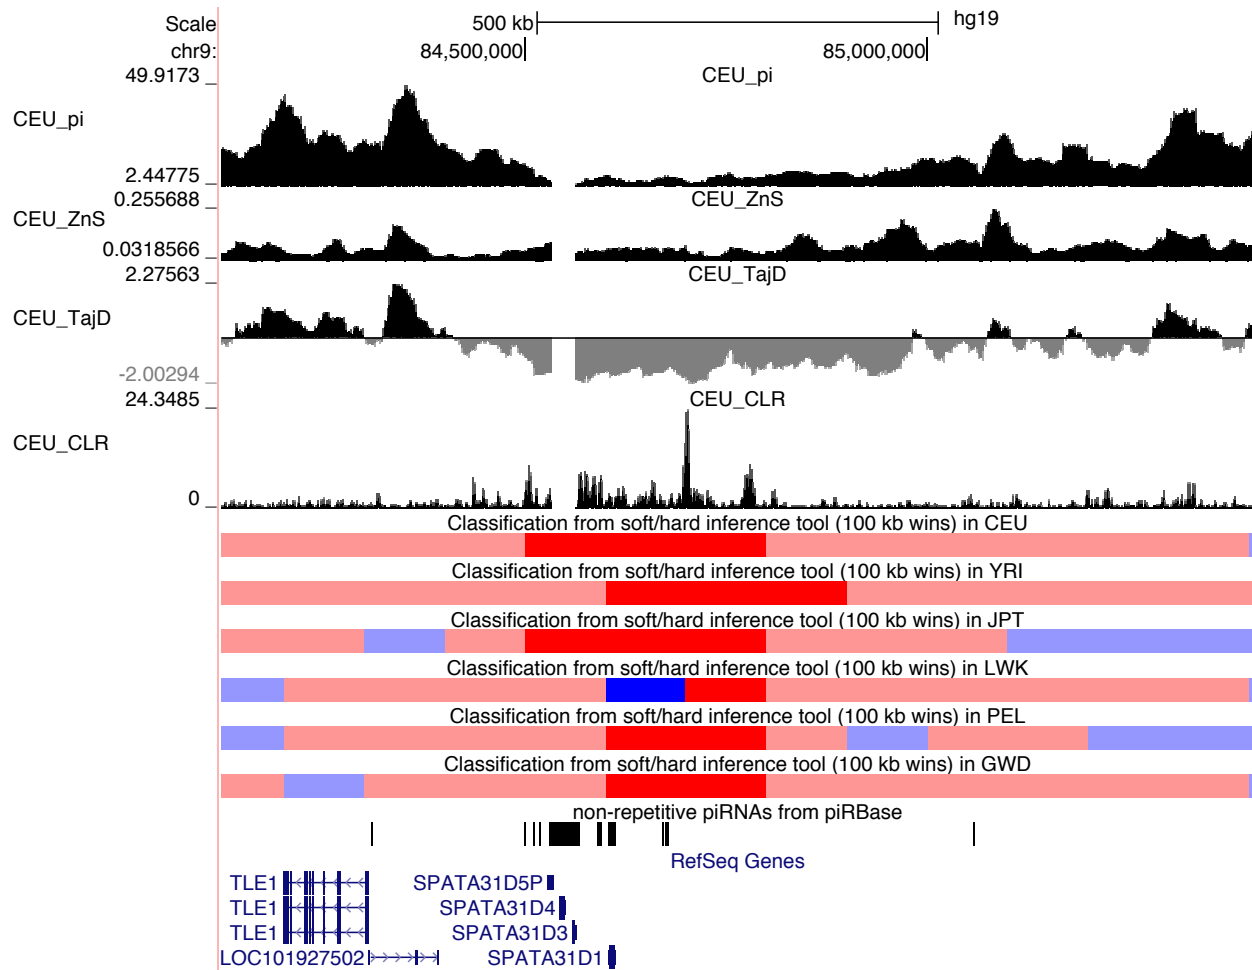

941  
 942 **Figure 4: Hard selective sweep near several *SPATA31* spermatogenesis-associated genes.**  
 943 The S/HIC classification tracks show the raw classifier output for each population (red=hard  
 944 sweep, blue=soft sweep, light red=hard-linked, light blue=soft-linked, black=neutral). We also  
 945 show the values of various population genetic summary and test statistics ( $\pi$ , Tajima's  $D$ , Kelly's  
 946  $Z_{nS}$ , and the SweepFinder composite likelihood ratio, or CLR). To avoid clutter, we only show  
 947 statistics from CEU.

948  
 949

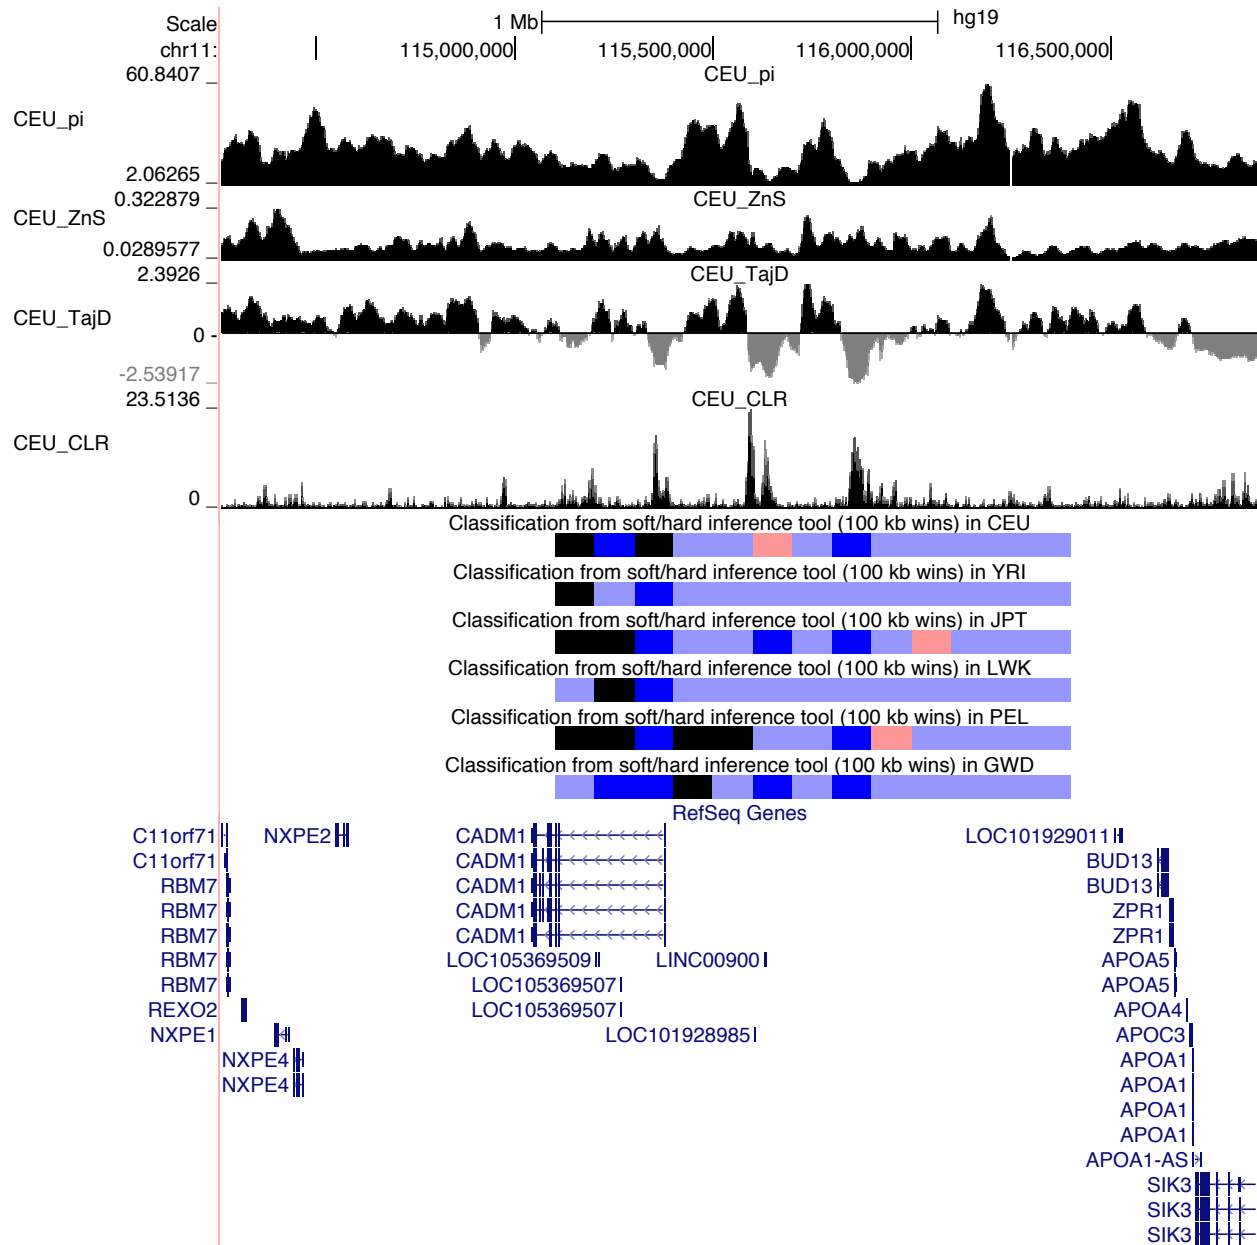

950  
951  
952  
953

**Figure 5: Soft selective sweeps near *CADM1*.** The same tracks are shown as in Figure 4.



948 **SUPPLEMENTARY FIGURE AND TABLE LEGENDS**

949 **supplementary fig. S1: Heatmaps showing the accuracy of our six classifiers on test data,**  
950 **one for each population.** On the  $y$ -axis, we show the location of the sweep relative to the  
951 classified window (i.e. the central sub-window), with the exception of the “Neutral” case where  
952 there is no sweep. The test data were simulated under the same demographic models used for  
953 training. On the  $x$ -axis we show the class inferred by S/HIC. A perfect classifier would infer  
954 “Hard” for 100% test instance where a hard sweep is in the focal sub-window (and analogously  
955 for soft sweeps), “Hard-linked” for 100% of cases where a hard sweep occurs elsewhere (and  
956 analogously for soft sweeps not located in the central sub-window), and “Neutral” for 100% of  
957 cases with no sweep. Both GWD and JPT also contain test results on a simulated set of examples  
958 of purifying/background selection. (A) Test results for CEU. (B) GWD. (C) JPT. (D) LWK. (E)  
959 PEL. (F) YRI.

960  
961 **supplementary fig. S2: Histograms of  $H_{12}$  and  $H_2/H_1$  within windows classified as hard**  
962 **sweeps, soft sweeps, or neutral for each population.**

963  
964 **supplementary fig. S3: Soft selective sweep in *GRIA2*.** The same tracks are shown as in figs. 4  
965 and 5.

966  
967 **supplementary fig. S4: False positive and false negative rates on simulated test data with**  
968 **varying values of  $\theta$ .** For each population, we used discoal to simulate 100 replicates for each  
969 combination of S/HIC’s five classes and three fixed values of  $\theta$ . In these simulations all  
970 parameters other than  $\theta$  had the same values as in supplementary table S5. “Medium”  $\theta$  refers to  
971 the mean value of  $\theta$  used for a given population’s training and testing simulations (Methods),  
972 while “Low” and “High”  $\theta$  refer to one-half and double this value, respectively. Examples of the  
973 Hard-linked, Soft-linked, or Neutral classes that are classified as sweeps represent false  
974 positives, while Hard and Soft examples not classified as sweeps are false negatives.

975  
976 **supplementary table S1: Number of sweeps found in each subset of populations.**

977  
978 **supplementary table S2: Numbers of hard and soft sweeps found in each population when**  
979 **imposing various posterior probability thresholds to S/HIC’s classifications.**

980  
981 **supplementary table S3: Enrichment of various sequence annotations in each S/HIC class.**

982  
983 **supplementary table S4: Enrichment of annotation terms in hard and soft sweeps (only**  
984 **terms with  $q < 0.05$  for at least one sweep type in at least one population are shown).**

985  
986 **supplementary table S5: Example command lines used to generate training data for each**  
987 **population, with a soft sweep occurring in the central sub-window.**
